# Supplementary material for: Correction: Chronic immune checkpoint inhibitor pneumonitis
Source: PubMed Central journal article supplement — J Immunother Cancer. 2020 Nov 13;8(2):e000840corr1. doi: 10.1136/jitc-2020-000840corr1 (PMC7668375; doi:10.1136/jitc-2020-000840corr1), 2020-11-13

**Supplemental Figure 1: Bronchoalveolar Lavage Fluid Cell Features in Patients with Chronic Immune Checkpoint Inhibitor Pneumonitis**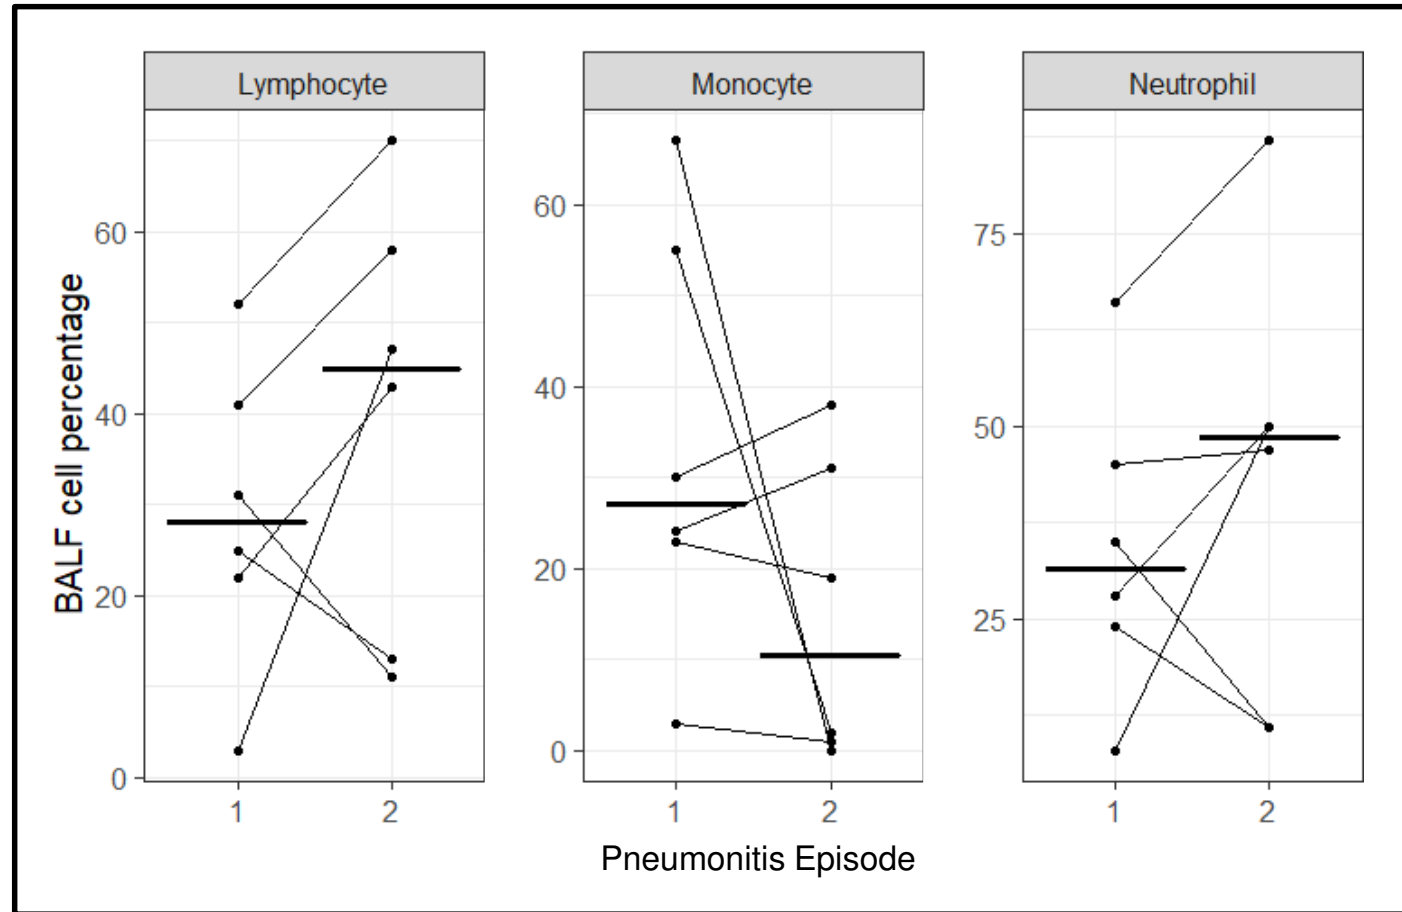

**Supplemental Figure 2: High Proliferative PD-1+ cell accumulation characterizes chronic PD-1/PD-L1 Pneumonitis**

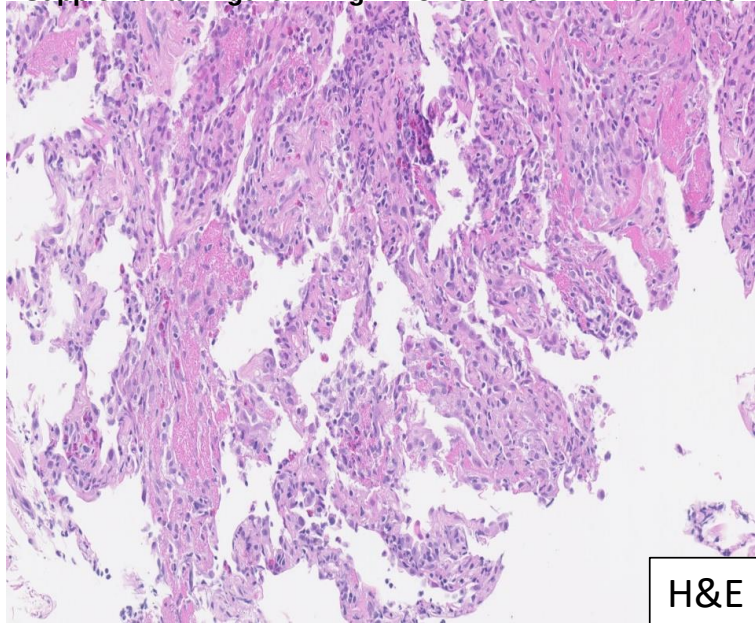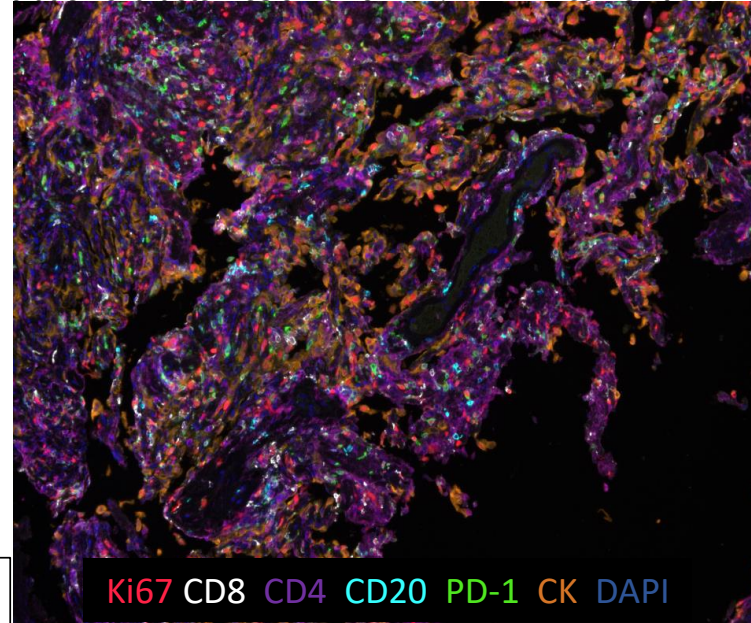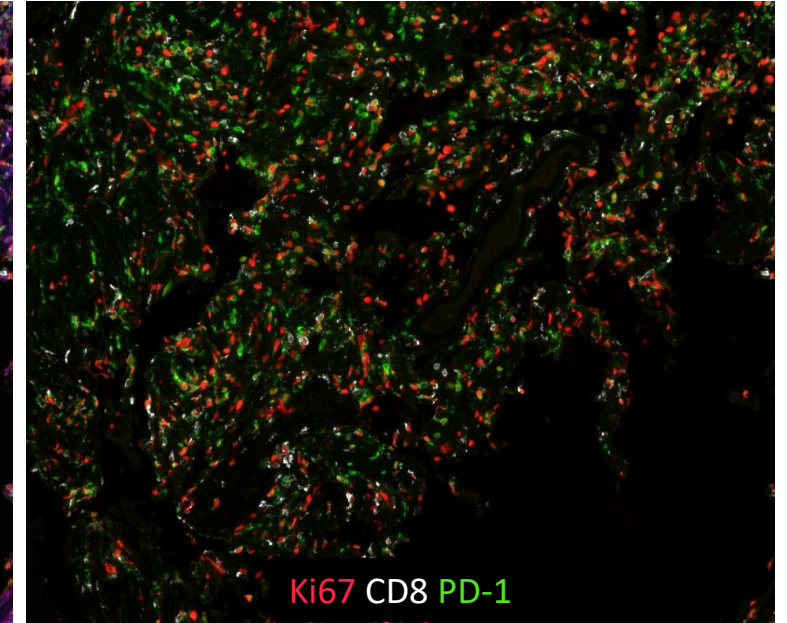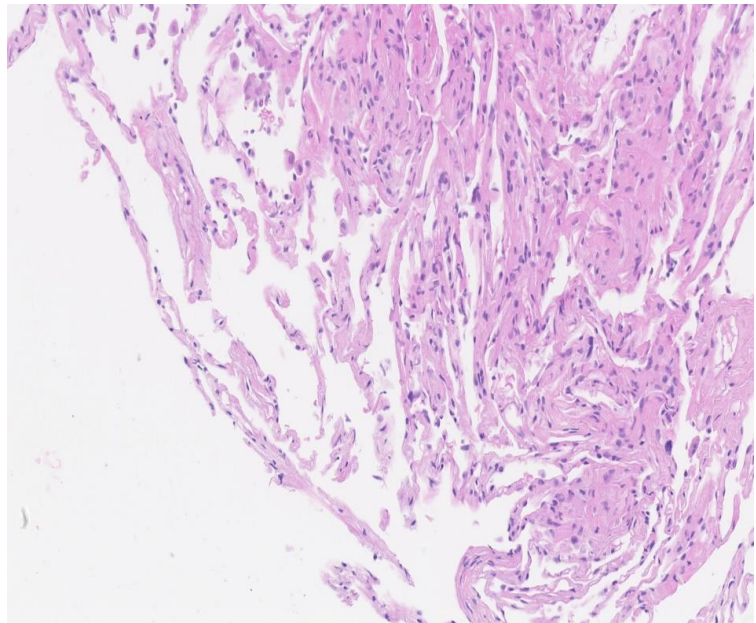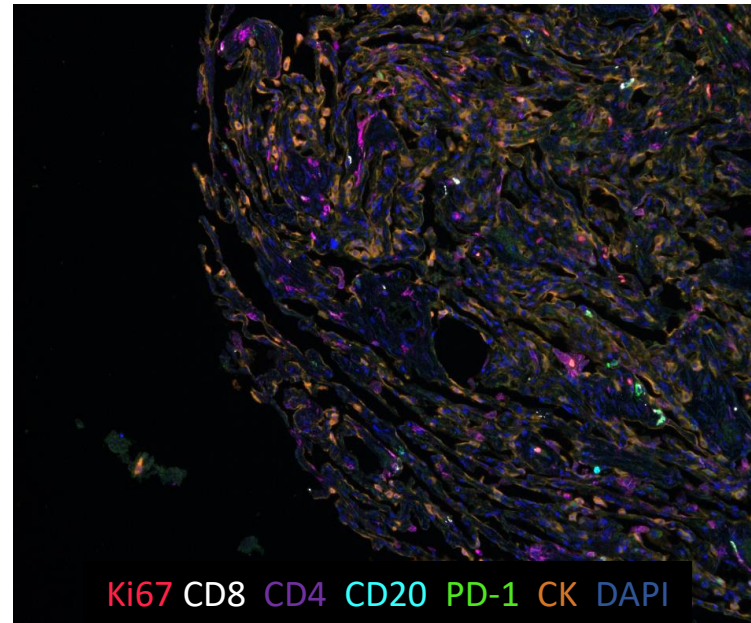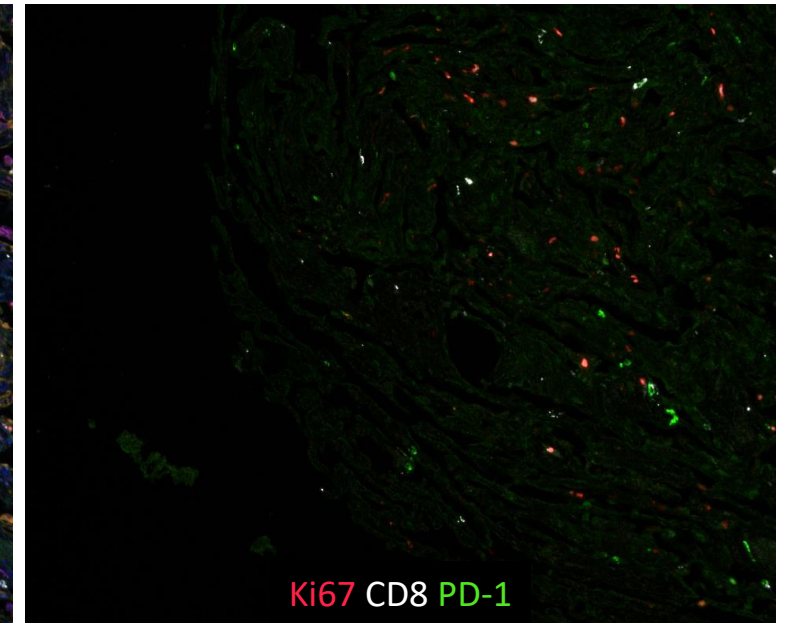

**Supplemental Figure 3: Spaghetti Plots of Corticosteroid Use in Individual Patients with Chronic Immune Checkpoint Inhibitor Pneumonitis**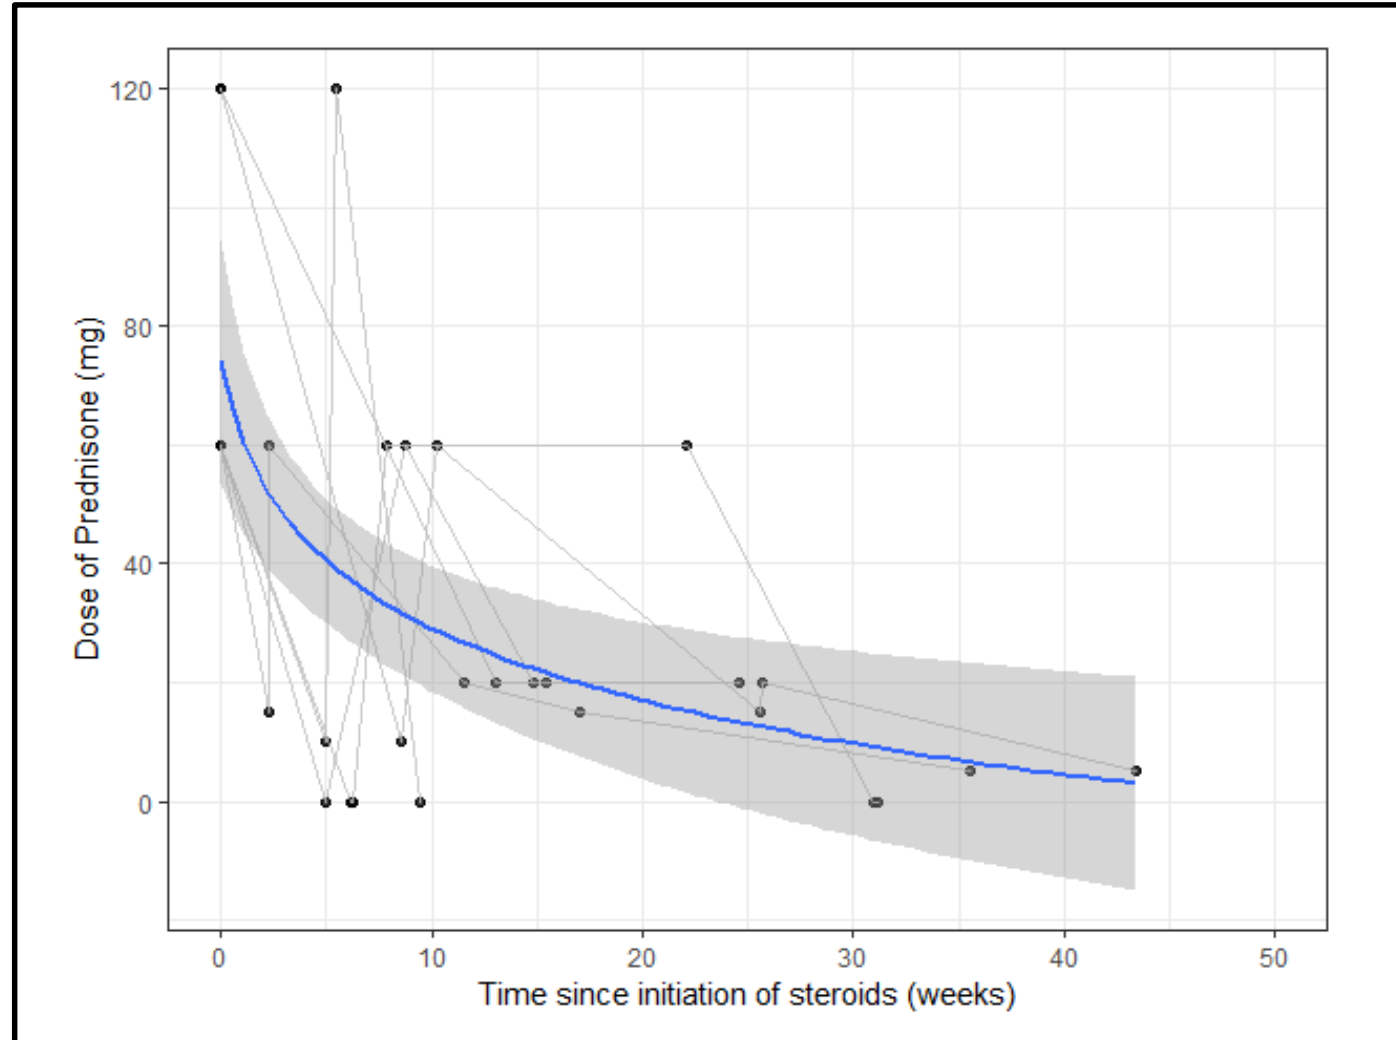

Supplement: jitc-2020-000840corr1supp001.pdf [file jitc-2020-000840corr1supp001.pdf]
