# Supplementary material for: Correction: Chronic immune checkpoint inhibitor pneumonitis
Source: PubMed Central journal article supplement — J Immunother Cancer. 2020 Nov 13;8(2):e000840corr1. doi: 10.1136/jitc-2020-000840corr1 (PMC7668375; doi:10.1136/jitc-2020-000840corr1), 2020-11-13
Supplement: jitc-2020-000840corr1supp002.pdf [file jitc-2020-000840corr1supp002.pdf]

## Supplemental Tables

Table 1: Methods for Multispectral Immunofluorescence

|   | Marker | Primary Antibody |         |                          |               |                       | Secondary Antibody |                   |                | TSA Fluorophore |              |
|---|--------|------------------|---------|--------------------------|---------------|-----------------------|--------------------|-------------------|----------------|-----------------|--------------|
|   |        | Species          | Clone   | Source                   | Final (ug/mL) | Incubation time (min) | Amplification      | Source            | Dilution (PBS) | Opal            | TSA Dilution |
| 1 | Ki67   | Mouse            | MM1     | Leica Biosystems         | 0.84          | 60                    | Mouse Powervision  | Leica Biosystems  | 1:1            | 570             | 1:150        |
| 2 | CD8    | Mouse            | 4B11    | Leica Biosystems         | 0.29          | 30                    | Opal Polymer       | Akoya Biosciences | None           | 620             | 1:150        |
| 3 | CD20   | Mouse            | L26     | Leica Biosystems         | 0.24          | 60                    | Opal Polymer       | Akoya Biosciences | None           | 520             | 1:300        |
| 4 | PD-1   | Rabbit           | EPR4877 | Abcam Inc                | 0.96          | 60                    | Rabbit Powervision | Leica Biosystems  | 1:1            | 650             | 1:150        |
| 5 | PanCK  | Mouse            | AE1AE3  | Agilent Technologies Inc | 0.708         | 30                    | Opal Polymer       | Akoya Biosciences | None           | 690             | 1:150        |
| 6 | CD4    | Rabbit           | EP204   | Milipore Sigma           | 0.18          | 120                   | Rabbit Powervision | Leica Biosystems  | 1:1            | 540             | 1:300        |

Slides were baked at 65°C for 3 hours before being loaded onto the Leica Bond (Leica Biosystems, Buffalo Grove, IL). Slides were heated at 60°C for 30 minutes then Dewax (Leica Biosystems) was applied to remove any paraffin. Antigen retrieval was performed using ER2 (Leica Biosystems) at 100°C for 40 minutes and then slides were washed. Non-specific staining was blocked using Blocking/Ab Diluent (Akoya Biosystems, Marlborough, MA) for 5 minutes, then the first primary antibody (i.e., Position 1) was applied followed by a series of washing steps. The secondary antibody corresponding to Position 1 was applied for 10 minutes, followed by washing and the addition of the Position 1 TSA-dye for 10 minutes (Opal 7 color kit, Akoya Biosystems). Slides were then heated using ER1 (Leica Biosystems) at 95°C for 20 minutes to strip the primary and secondary antibodies and washed again. The staining process was repeated for Positions 2–6. After the last round of antibody stripping, DAPI (Opal 7 color kit, Akoya Biosystems) was applied, the slides were washed for a final time and then coverslipped using ProLong™ Diamond Antifade Mountant (Life Technologies, Waltham, MA). mIF stained slides were scanned at 200x magnification using the Vectra Polaris and viewed using inForm (Akoya Biosystems, Marlborough, MA).

**Table 2: Clinical Characteristics of Patients with Chronic versus Acute (i.e. non-chronic) Immune Checkpoint Inhibitor Pneumonitis**

|                              | Acute ICI-pneumonitis (n=42) <sup>a</sup> |              |            | Chronic ICI-Pneumonitis | p    |
|------------------------------|-------------------------------------------|--------------|------------|-------------------------|------|
|                              | Melanoma (n=4)                            | NSCLC (n=37) | All (n=41) | All (n=6)               |      |
| Median age, y (IQR)          | 60 (4.25)                                 | 71 (10)      | 70 (12)    | 77 (11)                 | 0.46 |
| Female sex, n (%)            | 2 (50)                                    | 17 (45)      | 19 (46)    | 3 (50)                  | 1    |
| Race, n (%)                  |                                           |              |            |                         | 0.57 |
| White                        | 4 (100)                                   | 30 (82%)     | 34 (83)    | 4 (66)                  |      |
| Black                        | 0 (0)                                     | 6 (16)       | 6 (15)     | 2 (33)                  |      |
| Asian                        | 0 (0)                                     | 1 (2)        | 1 (2)      | 0 (0)                   |      |
| Smoking Status, n (%)        |                                           |              |            |                         | 0.54 |
| Former                       | 2 (50)                                    | 29 (78%)     | 31 (76)    | 4 (66)                  |      |
| Never                        | 2 (50)                                    | 6 (16%)      | 8 (20)     | 1 (17)                  |      |
| Current                      | 0 (0)                                     | 2 (6%)       | 2 (4)      | 1 (17)                  |      |
| NSCLC Tumor histology, n (%) |                                           |              |            |                         | 0.7  |
| Squamous cell                | -                                         | 14 (38)      | 14 (38)    | 3 (50)                  |      |
| Adenocarcinoma               | -                                         | 18 (49)      | 18 (49)    | 2 <sup>b</sup> (33)     |      |
| Other                        | -                                         | 5 (13)       | 5 (13)     | 1 (17)                  |      |
| Tumor Stage                  |                                           |              |            |                         | 0.87 |
| I                            | 0 (0)                                     | 1 (3)        | 1 (2)      | 0 (0)                   |      |
| II                           | 0 (0)                                     | 5 (13)       | 5 (12)     | 0 (0)                   |      |
| III                          | 0 (0)                                     | 12 (32)      | 12 (29)    | 2 (33)                  |      |
| IV                           | 4 (100)                                   | 18 (48)      | 22 (54)    | 4 (66)                  |      |
| Unknown                      | 0 (0)                                     | 1 (3)        | 1 (2)      | 0 (0)                   |      |
| Prior Chemotherapy, n (%)    | 0 (0)                                     | 25 (66)      | 25 (60)    | 3 (50)                  | 0.9  |
| Prior Surgery, n (%)         | 2 (50)                                    | 7 (19)       | 9 (21)     | 2 (33)                  | 0.9  |
| Prior Radiation, n (%)       | -                                         | 14 (38)      | 14 (34)    | 2 (33)                  | 1    |
| ICI agent, n (%)             |                                           |              |            |                         | 0.02 |
| Nivolumab                    | 0 (0)                                     | 27 (73)      | 27 (66)    | 1 (17)                  |      |
| Pembrolizumab                | 1 (25)                                    | 2 (6)        | 3 (7)      | 0 (0)                   |      |
| Durvalumab                   | 1 (25)                                    | 0 (0)        | 1 (2)      | 0 (0)                   |      |
| Ipilimumab/Nivolumab         | 2 (50)                                    | 7 (20)       | 9 (22)     | 5 (83)                  |      |

<sup>a</sup> The 6 patients adjudicated with chronic ICI pneumonitis were excluded from this group

<sup>b</sup> Both cases of adenocarcinoma in the chronic ICI-pneumonitis group were *KRAS*-mutant adenocarcinoma

IQR: Inter-quartile range; ICI: immune checkpoint inhibitor; NSCLC: Non-small cell lung cancer

**Table 3: Median Corticosteroid Doses and Duration for Initial and Subsequent Episodes of Immune Checkpoint Inhibitor Pneumonitis**

|                                            | <b>All (n=6)</b> |          | <b>Resolved (n=3)</b> |          | <b>Unresolved (n=3)</b> |          |
|--------------------------------------------|------------------|----------|-----------------------|----------|-------------------------|----------|
|                                            | Median           | Range    | Median                | Range    | Median                  | Range    |
| Initial Steroid dose (mg)                  | 60               | (60-120) | 60                    | -        | 120                     | (60-120) |
| Initial steroid duration (d)               | 42               | (21-84)  | 42                    | (42-84)  | 38                      | (21-38)  |
| Steroid dose at which CIP re-appeared (mg) | 10               | (0-20)   | 0                     | (0,15)   | 10                      | (10-20)  |
| Repeat steroid dose (mg)                   | 60               | (30-120) | 60                    | (30-120) | 60                      | -        |
| Total Steroid duration (d)                 | 259              | (70-602) | 217                   | (70-602) | 301                     | (98-371) |

d=day; mg=milligram
